# Supplementary material for: A new-type high-entropy electrocatalyst with a pyrochlore structure for acid-water oxidation
Source: Royal Society of Chemistry journal article supplement (doi:10.1039/d4ta01382d), 2024-01-01
Supplement: d4ta01382d1.pdf [file d4ta01382d1.pdf]

1  
2  
3  
4  
5  
6  
7  
8  
9  
10  
11  
12  
13  
14  
15  
16  
17  
18  
19  
20  
21  
22  
23  
24  
25  
26  
27  
28

## Supporting Information

### **A new-type high-entropy electrocatalyst with a pyrochlore structure for acid-water oxidation**

Jinhui Zhang, Lei Shi<sup>\*</sup>, Xianbing Miao, Liping Yang, and Shiming Zhou

*Hefei National Research Center for Physical Sciences at the Microscale, University of Science and Technology of China, Hefei 230026, Anhui, P. R. China.*

<sup>\*</sup>E-mail: shil@ustc.edu.cn;

Phone: +86-551-63607924.

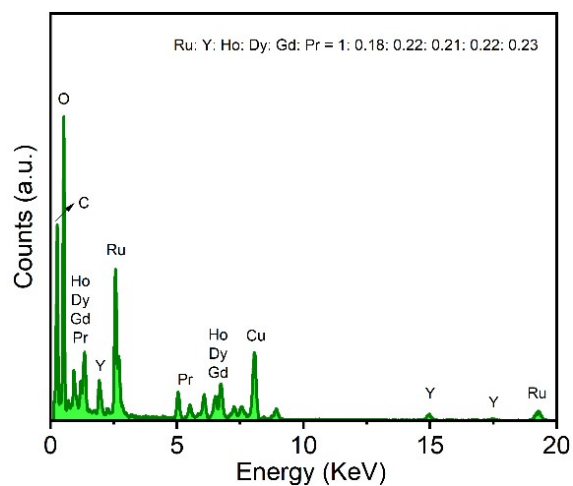

29

30 Figure S1. EDS spectrum of HE-YRO. The signals of Cu and C in the spectrum were  
31 originated from the copper grid coated by carbon membrane.

32

33

34

35

36

37

38

39

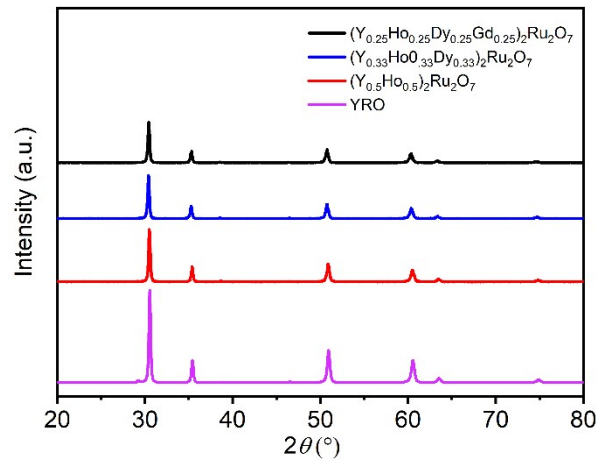

40

41 Figure S2. XRD patterns of YRO,  $(Y_{0.5}Ho_{0.5})_2Ru_2O_7$ ,  $(Y_{0.33}Ho_{0.33}Dy_{0.33})_2Ru_2O_7$ , and  
42  $(Y_{0.25}Ho_{0.25}Dy_{0.25}Gd_{0.25})_2Ru_2O_7$ .

43

44

45

46

47

48

49

50

51

52

53

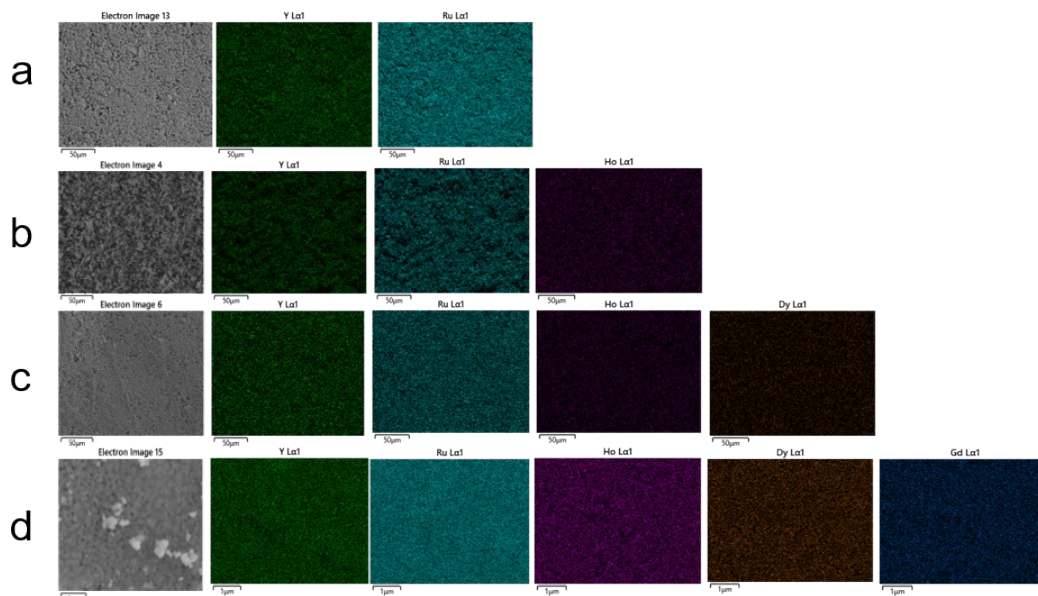

54

55 Figure S3. SEM-EDS mappings of (a) YRO, (b)  $(Y_{0.5}Ho_{0.5})_2Ru_2O_7$ , (c)  $(Y_{0.33}Ho_{0.33}Dy_{0.33})_2Ru_2O_7$ ,  
 56 and (d)  $(Y_{0.25}Ho_{0.25}Dy_{0.25}Gd_{0.25})_2Ru_2O_7$ .

57

58

59

60

61

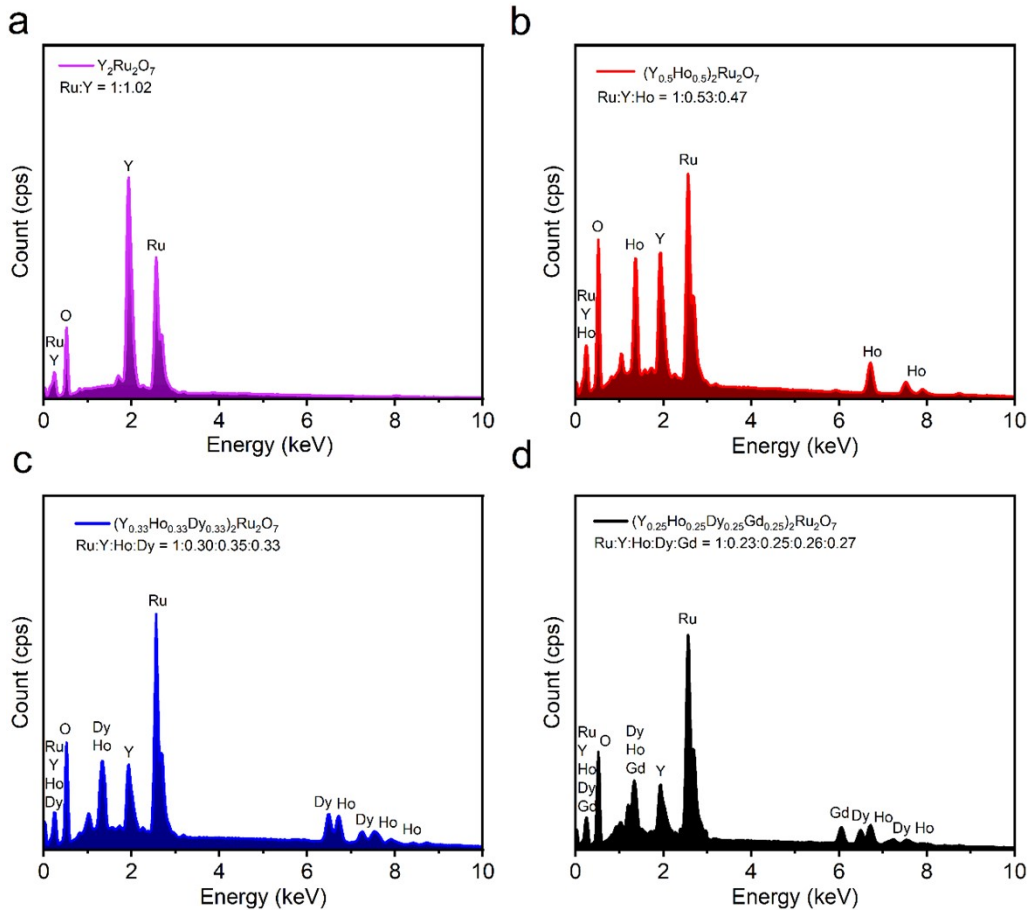

62

63 Figure S4. SEM-EDS spectra of (a) YRO, (b)  $(Y_{0.5}Ho_{0.5})_2Ru_2O_7$ , (c)  $(Y_{0.33}Ho_{0.33}Dy_{0.33})_2Ru_2O_7$ ,

64 and (d)  $(Y_{0.25}Ho_{0.25}Dy_{0.25}Gd_{0.25})_2Ru_2O_7$ .

65

66

67

68

69

70

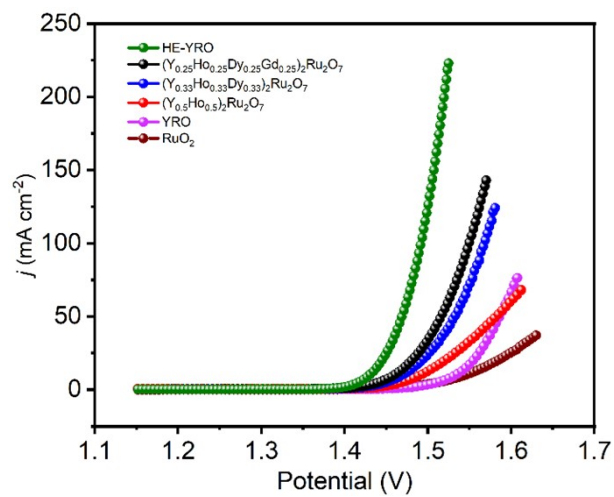

71

72 Figure S5. Polarization curves of as-prepared Ru-based catalysts and commercial RuO<sub>2</sub>.

73

74

75

76

77

78

79

80

81

82

83

84

85

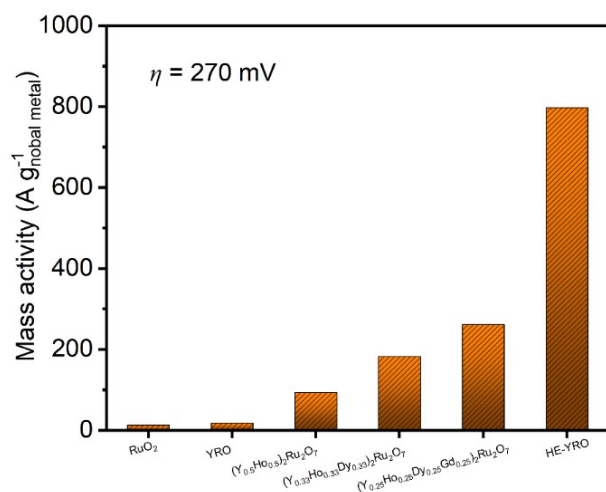

86

87 Figure S6. Comparison of mass activity at  $\eta = 270$  mV.

88

89

90

91

92

93

94

95

96

97

98

99

100

101

102

103

104

105

106

107

108

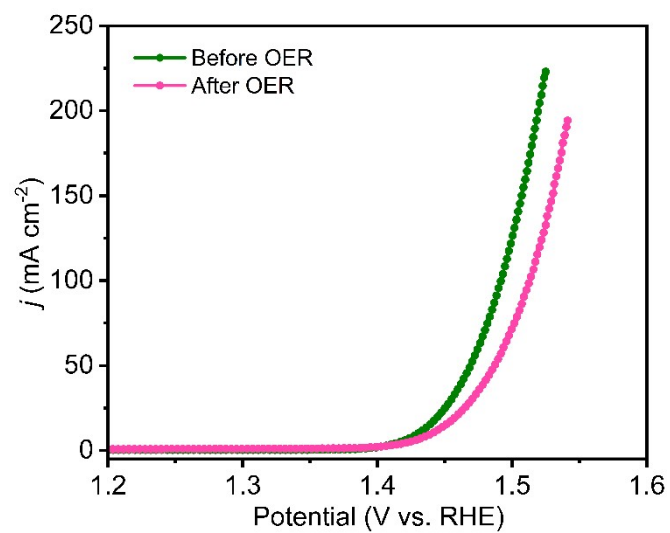

109

110 Figure S7. Polarization curves for HE-YRO before and after OER test.

111

112

113

114

115

116

117

118

119

120

121

122

123

124



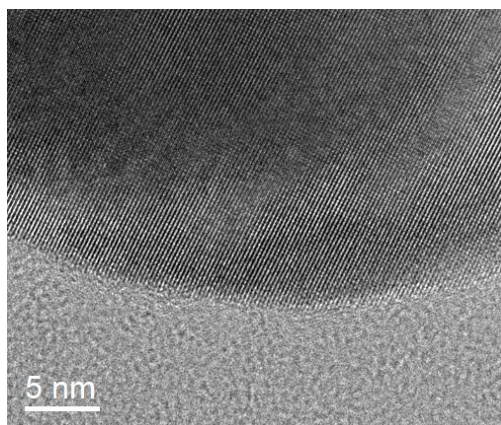

125

126 Figure S8. HRTEM image of the HE-YRO electrocatalyst after the stability test.

127

128

129

130

131

132

133

134

135

136

137

138

139

140

141

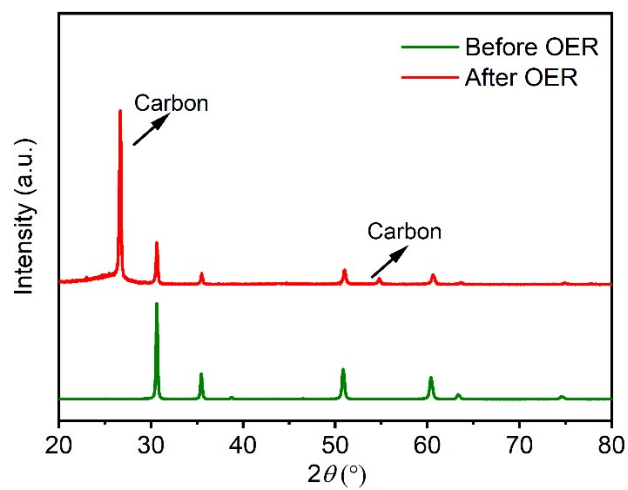

142

143 Figure S9. XRD patterns of HE-YRO before and after the OER testing.

144

145

146

147

148

149

150

151

152

153

154

155

156

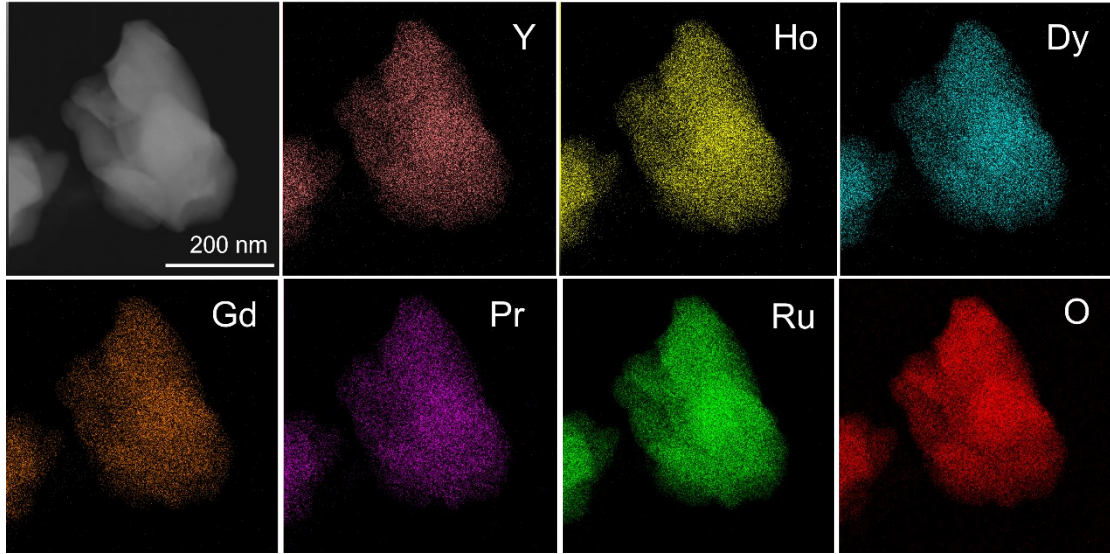

157

158 Figure S10. HRTEM-EDS elemental mappings of the HE-YRO sample after OER.

159

160

161

162

163

164

165

166

167

168

169

170

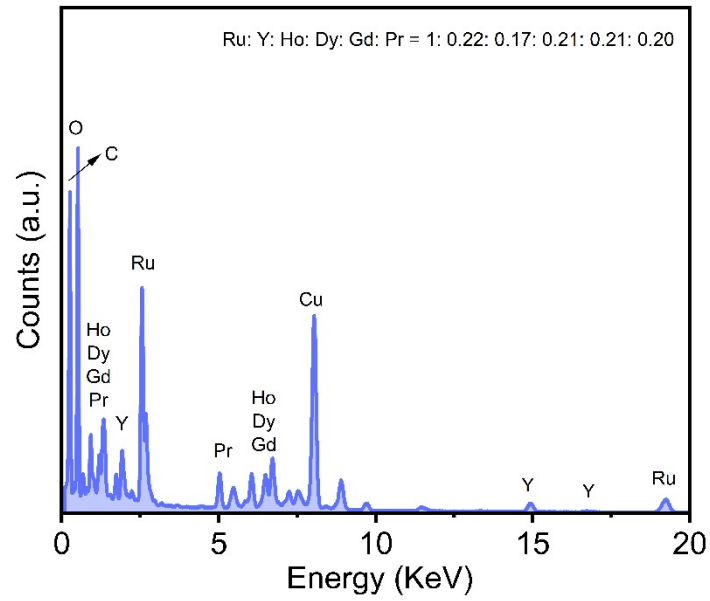

171

172 Figure S11. EDS spectrum of HE-YRO after OER. The signals of Cu and C in the  
173 spectrum were originated from the copper grid coated by carbon membrane.

174

175

176

177

178

179

180

181

182

183

184

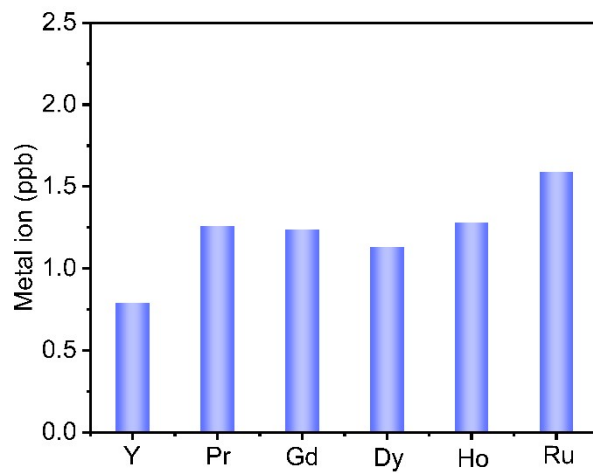

185

186 Figure S12. ICP analysis for HE-YRO after OER test.

187

188

189

190

191

192

193

194

195

196

197

198

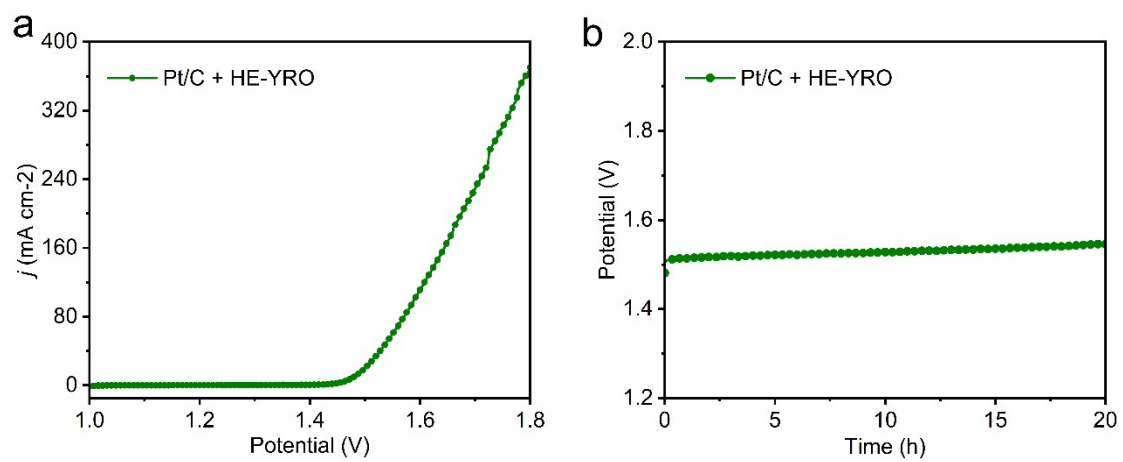

199

200 Figure S13. (a) Polarization curve of HE-YRO || Pt/C for overall water splitting. (b)  
201 Chronopotentiometric curve water electrolysis for the HE-YRO || Pt/C in a two-electrode  
202 setup with a current density of 10 mA cm<sup>-2</sup>.

203

204

205

206

207

208

209

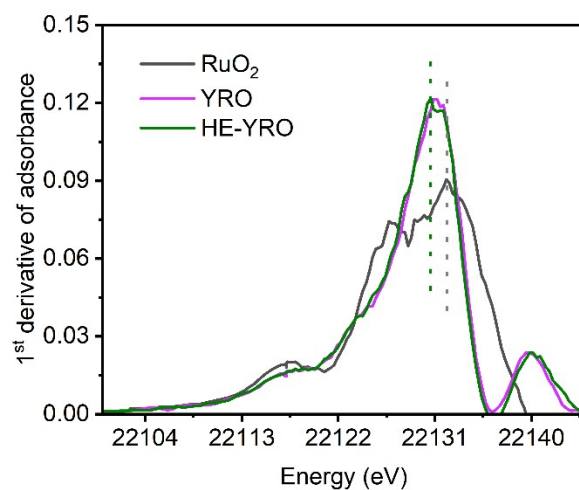

210

211 Figure S14. 1<sup>st</sup> derivative curves of Ru *K*-edge XANES spectra for HE-YRO, YRO, and RuO<sub>2</sub>.

212

213

214

215

216

217

218

219

220

221

222

223

224

225

226

227

228

229

230

231

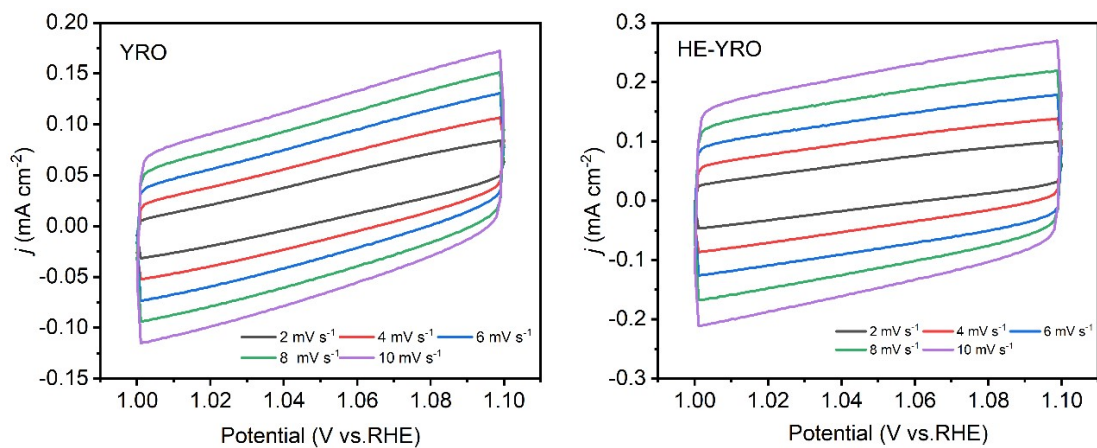

232

233 Figure S15. Cyclic voltammetry curves in O<sup>2</sup>-saturated 0.5M H<sub>2</sub>SO<sub>4</sub>. The sweep rates are in the

234 range of 2-10 mV s<sup>-1</sup>.

235

236

237

238

239

240

241

242

243

244

245

246

247

248

249

250

251

252

253

254



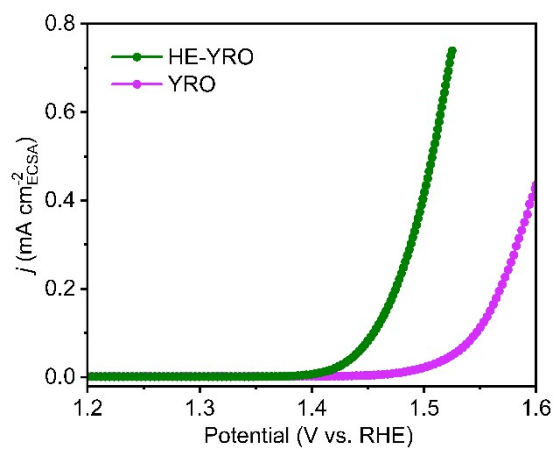

255

256 Figure S16. Polarization curves for HE-YRO and YRO normalized by ECSA.

257

258

259

260

261

262

263

264

265

266

267

268

269

270

271

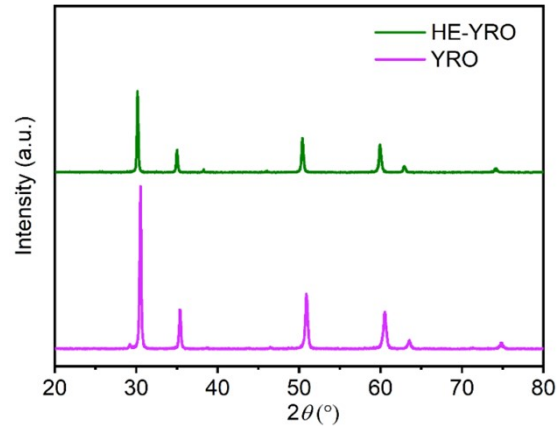

272

273 Figure S17. XRD patterns of HE-YRO and YRO.

274

275

276

277

278

279

280

281

282

283

284

285

286

287

288

289

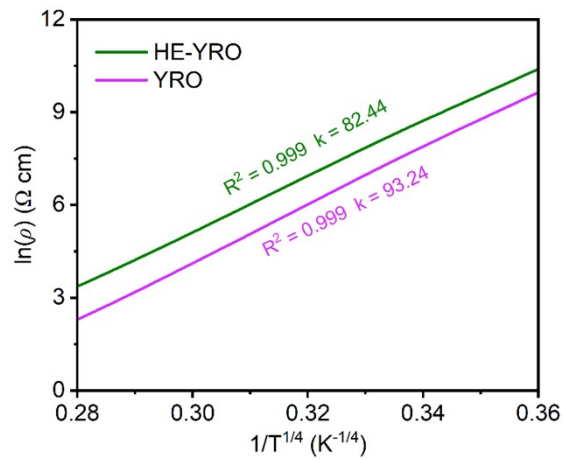

290

291 Figure S18. The  $\rho(T)$  curves fitted with the three-dimensional VRH model. The hopping energy  $W$

292 ( $W=0.25k_B T_0^{1/4} T^{3/4}$ , where  $k_B$  is the Boltzmann constant) is proportional to  $T_0^{1/4}$  ( $k = T_0^{1/4}$ ).

293

294

295

296

297

298

299

300

301

302

303

304

305

306

307

308

309

310

311

312

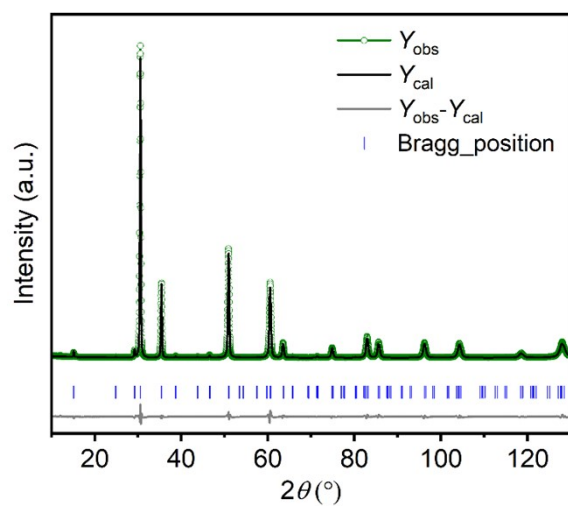

313

314 Figure S19. XRD pattern for YRO together with the Rietveld refined results.

315

316

317

318

319

320

321

322

323

324

325

326

327

328

329

330

331

332

333

334

335

336

337

338

339

340

341

342

343

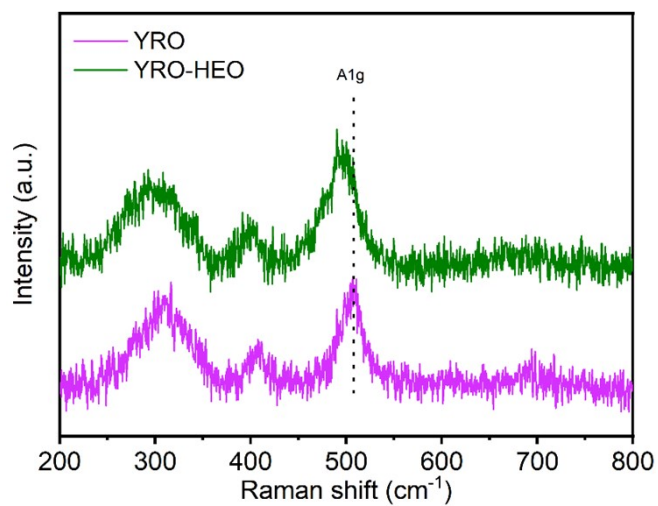

344  
345 Figure S20. Raman spectra of HE-YRO and YRO.

346  
347  
348  
349  
350  
351  
352  
353  
354  
355  
356  
357  
358  
359  
360  
361  
362  
363  
364  
365  
366  
367  
368  
369  
370  
371  
372  
373  
374  
375  
376

377 Table S1. Refined structural parameters of the room temperature XRD patterns for HE-YRO and  
378 YRO samples.

| Sample                        | HE-YRO       | YRO          |
|-------------------------------|--------------|--------------|
| Space group                   | <i>Fd-3m</i> |              |
| <i>a</i> (Å)                  | 10.2121(4)   | 10.1449(1)   |
| Cell volume (Å <sup>3</sup> ) | 1064.9891(4) | 1044.1030(2) |
| Ru-O bond (Å)                 | 1.9856(6)    | 1.9964(8)    |
| Ru-O-Ru bond angle (°)        | 130.78       | 127.86       |
| <i>R<sub>p</sub></i>          | 5.93         | 6.41         |
| <i>R<sub>wp</sub></i>         | 8.21         | 9.04         |

379

380

381

382

383

384

385

386

387

388

389

390

391

392

393 Table S2. Element ratios of the HE-YRO before OER test determined using ICP-AES.

| Sample | Ru (at. %) | Y (at. %) | Ho (at. %) | Dy (at. %) | Gd (at. %) | Pr (at. %) |
|--------|------------|-----------|------------|------------|------------|------------|
| HE-YRO | 50.3       | 9.7       | 10.1       | 9.6        | 9.9        | 10.4       |

394 The calculated molar ratio of Ru/Y/Ho/Dy/Gd/Pr is 1.00: 0.19: 0.20: 0.19: 0.20: 0.21

395

396

397

398

399

400

401

402

403

404

405

406

407

408

409

410 Table S3. Comparison of OER activities for the Ru-based catalysts in acid media.

| Catalysts                                                                               | $\eta_{10}$<br>(mV) | Mass activity@ $\eta$<br>(A g <sup>-1</sup> @ mV) | Electrolytes                        | References       |
|-----------------------------------------------------------------------------------------|---------------------|---------------------------------------------------|-------------------------------------|------------------|
| <b>HE-YRO</b>                                                                           | 200                 | 797.1@270                                         | 0.5M H <sub>2</sub> SO <sub>4</sub> | <b>This work</b> |
| <b>YRO</b>                                                                              | 304                 | 18.3@270                                          | 0.5M H <sub>2</sub> SO <sub>4</sub> | <b>This work</b> |
| <b>Y<sub>1.75</sub>Ca<sub>0.25</sub>Ru<sub>2</sub>O<sub>7-<math>\delta</math></sub></b> | 275                 | 597.85@270                                        | 0.5M H <sub>2</sub> SO <sub>4</sub> | S1               |
| <b>Y<sub>1.85</sub>Ba<sub>0.15</sub>Ru<sub>2</sub>O<sub>7-<math>\delta</math></sub></b> | 278                 | 681.6@270                                         | 0.5M H <sub>2</sub> SO <sub>4</sub> | S2               |
| <b>MoO<sub>x</sub>@Y<sub>2</sub>Ru<sub>2</sub>O<sub>7-<math>\delta</math></sub></b>     | 240                 | ~300@270                                          | 0.1M HClO <sub>4</sub>              | S3               |
| <b>Y<sub>2</sub>RuMnO<sub>7</sub></b>                                                   | 260                 | ~100@270                                          | 0.1M HClO <sub>4</sub>              | S4               |
| <b>Y<sub>1.7</sub>Sr<sub>0.3</sub>Ru<sub>2</sub>O<sub>7</sub></b>                       | 264                 | 418@270                                           | 0.5M H <sub>2</sub> SO <sub>4</sub> | S5               |
| <b>S<sub>II</sub>-RuCoO NRs</b>                                                         | 231                 | 783@270                                           | 0.5M H <sub>2</sub> SO <sub>4</sub> | S6               |
| <b>RuIr-HEO</b>                                                                         | 220                 | 666.5@270                                         | 0.5M H <sub>2</sub> SO <sub>4</sub> | S7               |
| <b>Ru<sub>5</sub>W<sub>1</sub>O<sub>x</sub></b>                                         | 235                 | 750@300                                           | 0.5M H <sub>2</sub> SO <sub>4</sub> | S8               |
| <b>RuNi<sub>2</sub>@G-250</b>                                                           | 227                 | 120@300                                           | 0.5M H <sub>2</sub> SO <sub>4</sub> | S9               |
| <b>Y<sub>1.75</sub>Co<sub>0.25</sub>Ru<sub>2</sub>O<sub>7-<math>\delta</math></sub></b> | 275                 | ~110@270                                          | 0.5M H <sub>2</sub> SO <sub>4</sub> | S10              |
| <b>Ho<sub>2</sub>Ru<sub>2</sub>O<sub>7</sub></b>                                        | 280                 | ~590@320                                          | 0.1M HClO <sub>4</sub>              | S11              |
| <b>Ru@IrO<sub>x</sub></b>                                                               | 282                 | 644.8@330                                         | 0.5M H <sub>2</sub> SO <sub>4</sub> | S12              |
| <b>Y<sub>2</sub>[Ru<sub>1.6</sub>Y<sub>0.4</sub>] O<sub>7-<math>\delta</math></sub></b> | ~240                | ~480@250                                          | 0.5M H <sub>2</sub> SO <sub>4</sub> | S13              |
| <b>Y<sub>1.85</sub>Zn<sub>0.15</sub>Ru<sub>2</sub>O<sub>7-<math>\delta</math></sub></b> | 291                 | 412.7@320                                         | 0.5M H <sub>2</sub> SO <sub>4</sub> | S14              |
| <b>Au-Ru nanoparticles</b>                                                              | 220                 | -                                                 | 0.5M H <sub>2</sub> SO <sub>4</sub> | S15              |
| <b>RuTe<sub>2</sub> nanorods</b>                                                        | 245                 | -                                                 | 0.5M H <sub>2</sub> SO <sub>4</sub> | S16              |
| <b>RuRh@(RuRh)O<sub>2</sub></b>                                                         | 245                 | 119.8@250                                         | 0.1M HClO <sub>4</sub>              | S17              |

411 ( $\eta_{10}$ : The overpotential of catalysts at 10 mA cm<sup>-2</sup>)

412

413

414

415

416

417

418

419



420 Table S4. XPS analysis of Ru 3p<sub>3/2</sub> region of HE-YRO and YRO.

| Species                            | HE-YRO             |          | YRO                |          |
|------------------------------------|--------------------|----------|--------------------|----------|
|                                    | Peak position (eV) | Area (%) | Peak position (eV) | Area (%) |
| Ru <sup>4+</sup>                   | 463.25             | 76.6     | 463.25             | 85.9     |
| Ru <sup>3+</sup>                   | 465.22             | 23.4     | 465.22             | 14.1     |
| Ru <sup>3+</sup> /Ru <sup>4+</sup> | 0.31               |          | 0.16               |          |

421

422

423

424

425

426

427

428

429

430

431

432

433

434

435

436 Table S5. XPS analysis of O 1s region of HE-YRO and YRO.

| Species                         | HE-YRO             |          | YRO                |          |
|---------------------------------|--------------------|----------|--------------------|----------|
|                                 | Peak position (eV) | Area (%) | Peak position (eV) | Area (%) |
| O <sub>L</sub>                  | 529.1              | 27.55    | 529.1              | 28.00    |
| O <sub>OH</sub>                 | 531.4              | 67.24    | 531.4              | 59.95    |
| O <sub>W</sub>                  | 533.2              | 5.21     | 533.2              | 12.05    |
| O <sub>OH</sub> /O <sub>L</sub> | 2.44               |          | 2.14               |          |

437

438

439

440

441

442

443

444

445

446

447

448

449

450

451

452

453

454

455

456

457

458

459

460

461

462

463

464

465

466

467

468

469

470 **Reference**

- 471 (S1). Q. Feng, Z. Zhao, X.-Z. Yuan, H. Li and H. Wang, *Appl. Catal. B: Environ.*, 2020, **260**, 118176.
- 472 (S2). Q. Feng, J. Zou, Y. Wang, Z. Zhao, M. C. Williams, H. Li and H. Wang, *ACS Appl. Mater. Interfaces*, 2020,  
473 **12**, 4520-4530.
- 474 (S3). T. Liu, H. Guo, Y. Chen, Z. Zhang and F. Wang, *Small*, 2023, **19**, 2206698.
- 475 (S4). D. Galyamin, J. Torrero, I. Rodríguez, M. J. Kolb, P. Ferrer, L. Pascual, M. A. Salam, D. Gianolio, V.  
476 Celorrio, M. Mokhtar, D. Garcia Sanchez, A. S. Gago, K. A. Friedrich, M. A. Peña, J. A. Alonso, F. Calle-  
477 Vallejo, M. Retuerto and S. Rojas, *Nat. Commun.*, 2023, **14**, 2010.
- 478 (S5). N. Zhang, C. Wang, J. Chen, C. Hu, J. Ma, X. Deng, B. Qiu, L. Cai, Y. Xiong and Y. Chai, *ACS Nano*, 2021,  
479 **15**, 8537-8548.
- 480 (S6). Q. Yao, Z. Yu, Y.-H. Chu, Y.-H. Lai, T.-S. Chan, Y. Xu, Q. Shao and X. Huang, *Nano Res.*, 2022, **15**, 3964-  
481 3970.
- 482 (S7). X. Miao, Z. Peng, L. Shi and S. Zhou, *ACS Catal.*, 2023, **13**, 3983-3989.
- 483 (S8). Y. Wen, C. Liu, R. Huang, H. Zhang, X. Li, F. P. Garcia de Arquer, Z. Liu, Y. Li and B. Zhang, *Nat.*  
484 *Commun.*, 2022, **13**, 4871.
- 485 (S9). X. Cui, P. Ren, C. Ma, J. Zhao, R. Chen, S. Chen, N. P. Rajan, H. Li, L. Yu, Z. Tian and D. Deng, *Adv.*  
486 *Mater.*, 2020, **32**, e1908126.
- 487 (S10). N. Han, S. Feng, Y. Liang, J. Wang, W. Zhang, X. Guo, Q. Ma, Q. Liu, W. Guo, Z. Zhou, S. Xie, K.  
488 Wan, Y. Jiang, A. Vlad, Y. Guo, E. M. Gaigneaux, C. Zhang, J. Fransaer and X. Zhang, *Adv. Func. Mater.*,  
489 2023, **33**, 2208399.
- 490 (S11). J. Yan, J. Zhu, D. Chen, S. Liu, X. Zhang, S. Yu, Z. Zeng, L. Jiang and F. Du, *J. Mater. Chem. A*, 2022,  
491 **10**, 9419-9426.
- 492 (S12). J. Shan, C. Guo, Y. Zhu, S. Chen, L. Song, M. Jaroniec, Y. Zheng and S.-Z. Qiao, *Chem*, 2019, **5**, 445-  
493 459.
- 494 (S13). J. Kim, P. C. Shih, Y. Qin, Z. Al-Bardan, C. J. Sun and H. Yang, *Angew. Chem. Int. Ed.*, 2018, **57**,  
495 13877-13881.
- 496 (S14). Q. Feng, Q. Wang, Z. Zhang, Y. Xiong, H. Li, Y. Yao, X.-Z. Yuan, M. C. Williams, M. Gu, H. Chen,  
497 H. Li and H. Wang, *Applied Catalysis B: Environmental*, 2019, **244**, 494-501.
- 498 (S15). L. Gloag, T. M. Benedetti, S. Cheong, Y. Li, X. H. Chan, L. M. Lacroix, S. L. Y. Chang, R. Arenal, I.  
499 Florea, H. Barron, A. S. Barnard, A. M. Henning, C. Zhao, W. Schuhmann, J. J. Gooding and R. D. Tilley,  
500 *Angew. Chem. Int. Ed.*, 2018, **57**, 10241-10245.
- 501 (S16). J. Wang, L. Han, B. Huang, Q. Shao, H. L. Xin and X. Huang, *Nat. Commun.*, 2019, **10**, 5692.
- 502 (S17). K. Wang, B. Huang, W. Zhang, F. Lv, Y. Xing, W. Zhang, J. Zhou, W. Yang, F. Lin, P. Zhou, M. Li, P.  
503 Gao and S. Guo, *J. Mater. Chem. A*, 2020, **8**, 15746-15751.
